# Supplementary material for: Fabrication of a protease sensor for caspase-3 activity detection based on surface plasmon resonance
Source: Royal Society of Chemistry journal article supplement (doi:10.1039/c3an01137b), 2013-01-01
Supplement: c3an01137b.pdf [file c3an01137b.pdf]

## Supplementary Information

### Fabrication of protease sensor for caspase-3 activity detection based on surface plasmon resonance

Hongxia Chen<sup>a</sup>, Qiaohan Mei<sup>a</sup>, Yafei Hou<sup>a</sup>, Xiaoli Zhu<sup>a</sup>, Kwangnak Koh<sup>b</sup>, Xiaoxi Li<sup>c</sup>, Genxi Li<sup>a, c, \*</sup>

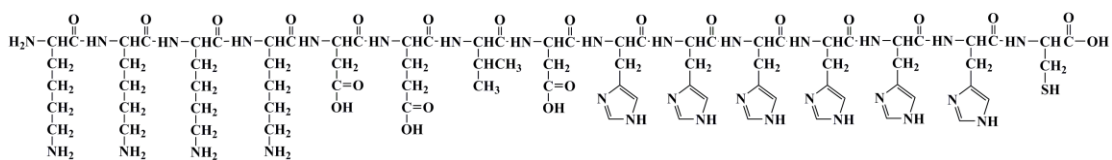

Fig S1. Chemical structure of KC-15 peptide

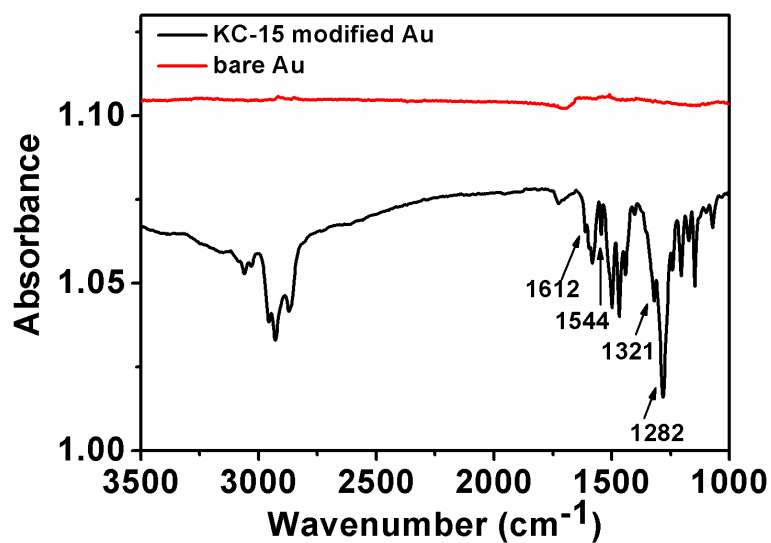

Fig S2. FTIR spectra of bare Au and KC-15 modified Au surface.

<sup>a</sup> Laboratory of Biosensing Technology, School of Life Sciences, Shanghai University, Shanghai 200444, P R China

<sup>b</sup> Department of Applied Nanoscience, Pusan National University, Miryang, 627-706, Republic of Korea

<sup>c</sup> Department of Biochemistry and State Key Laboratory of Pharmaceutical Biotechnology, Nanjing University, Nanjing 210093, P R China

\* Corresponding author at Department of Biochemistry and State Key Laboratory of Pharmaceutical Biotechnology, Nanjing University, Nanjing 210093, China. Fax: +86 25 83592510. E-mail address: genxili@nju.edu.cn (G. Li).
